# Supplementary material for: The cardiac translational landscape reveals that micropeptides are new players involved in cardiomyocyte hypertrophy
Source: PubMed Central journal article supplement — Mol Ther. 2021 Mar 5;29(7):2253–67. doi: 10.1016/j.ymthe.2021.03.004 (PMC8261087; doi:10.1016/j.ymthe.2021.03.004), 2021-03-05
Supplement: mmc1.pdf [file mmc1.pdf]

## **Supplemental Information**

**The cardiac translational landscape  
reveals that micropeptides are new players  
involved in cardiomyocyte hypertrophy**

**Youchen Yan, Rong Tang, Bin Li, Liangping Cheng, Shangmei Ye, Tiquan Yang, Yan-Chuang Han, Chen Liu, Yugang Dong, Liang-Hu Qu, Kathy O. Lui, Jian-Hua Yang, and Zhan-Peng Huang**

**A**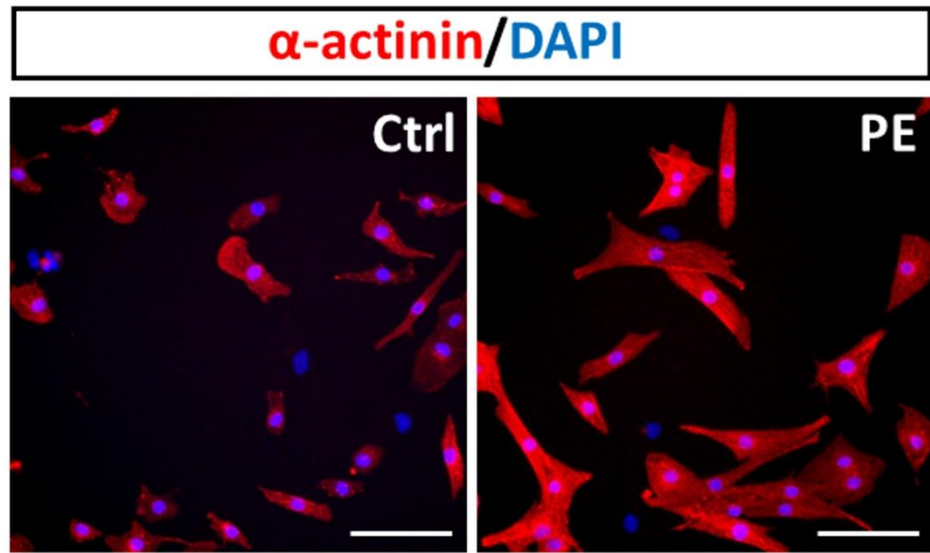**B**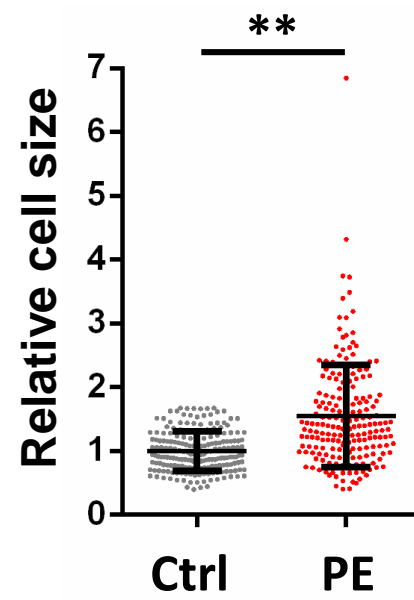**C**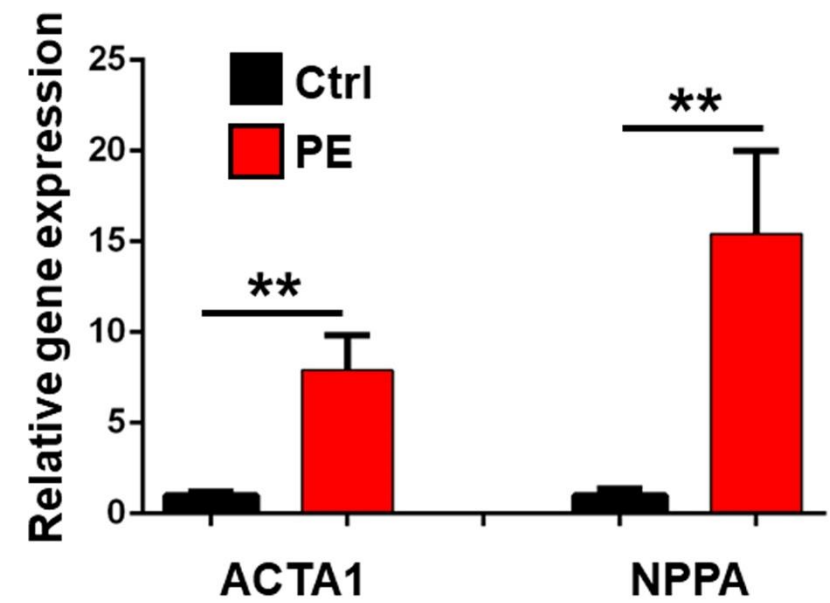

**A**

## PI3K/AKT signaling pathway

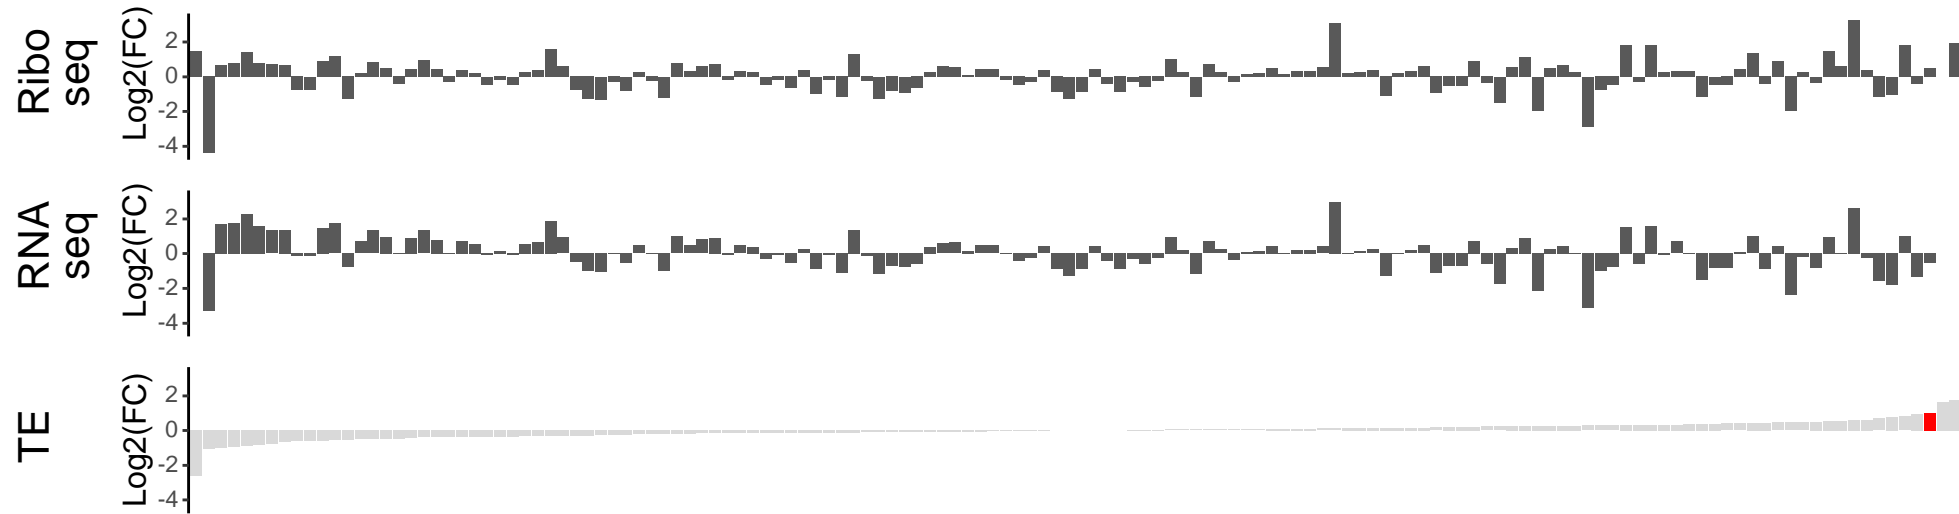**B**

## MAPK signaling pathway

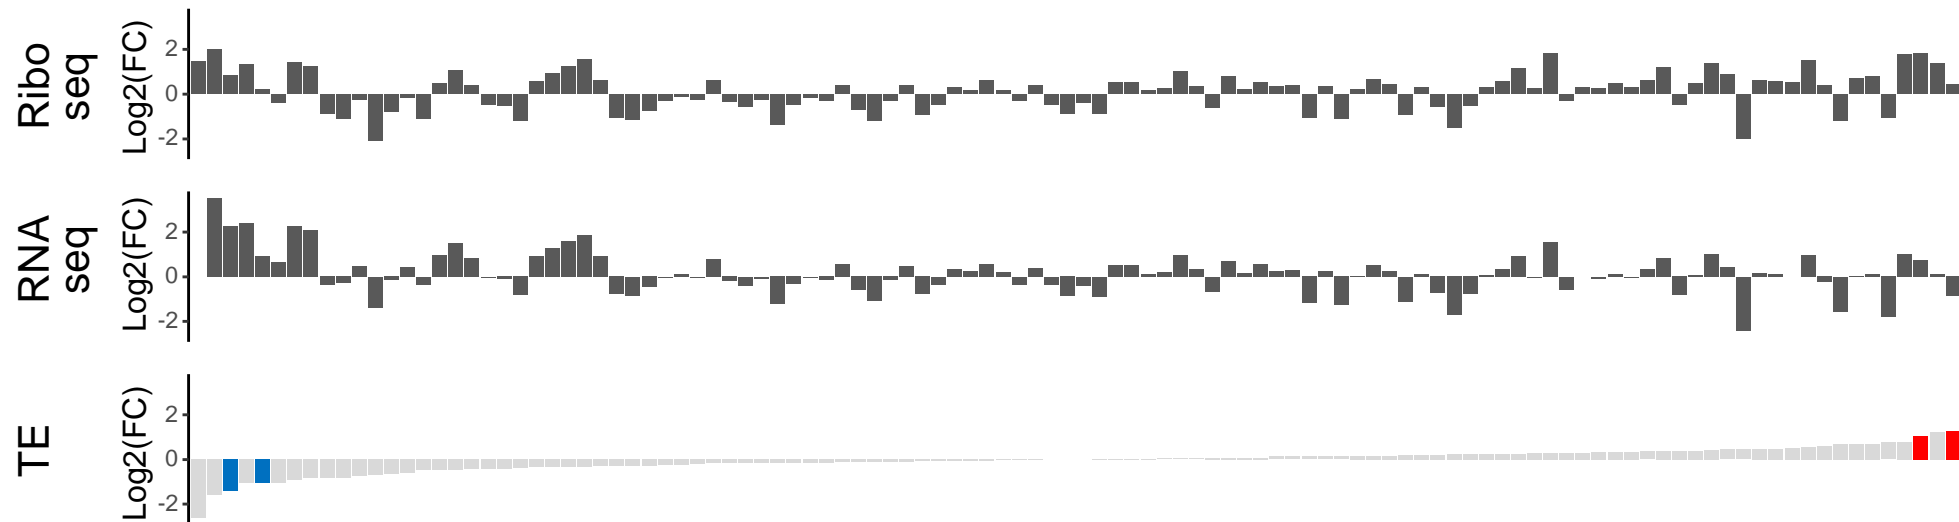

**A**

PI3K/AKT signaling pathway

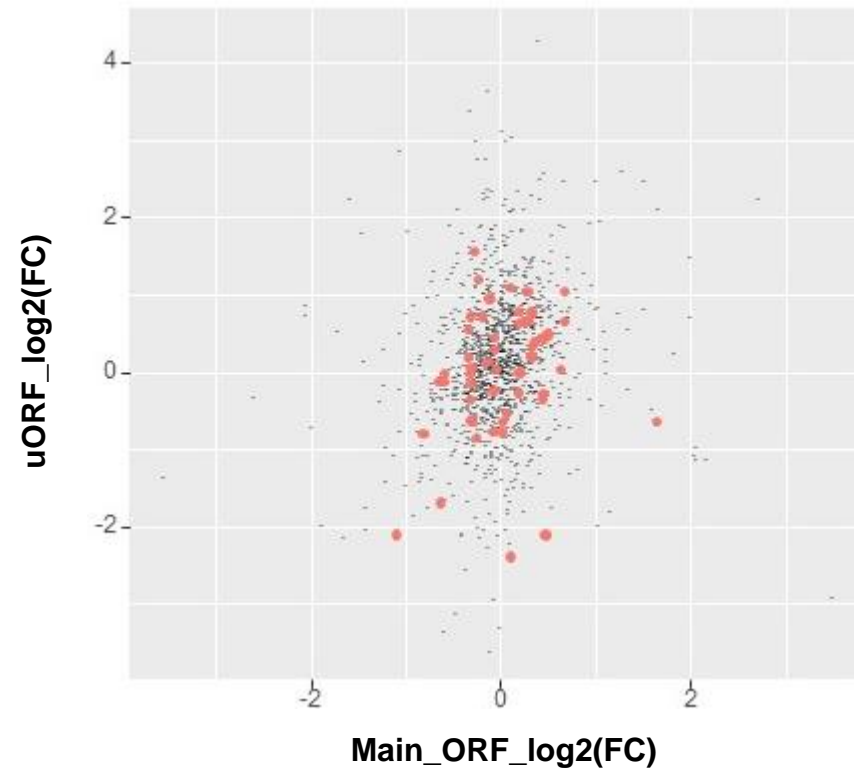**B**

MAPK signaling pathway

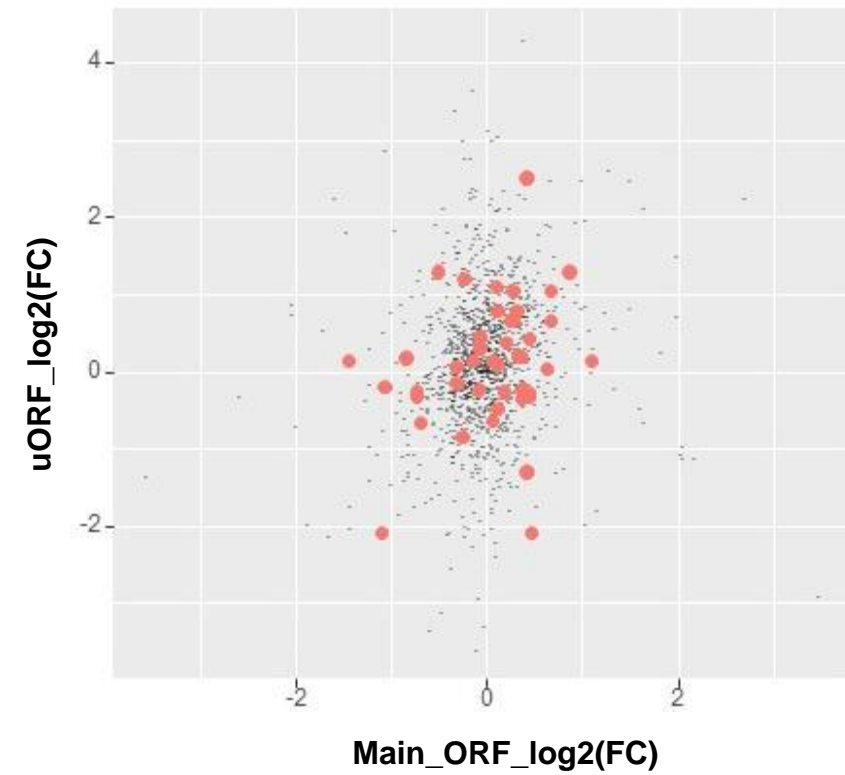

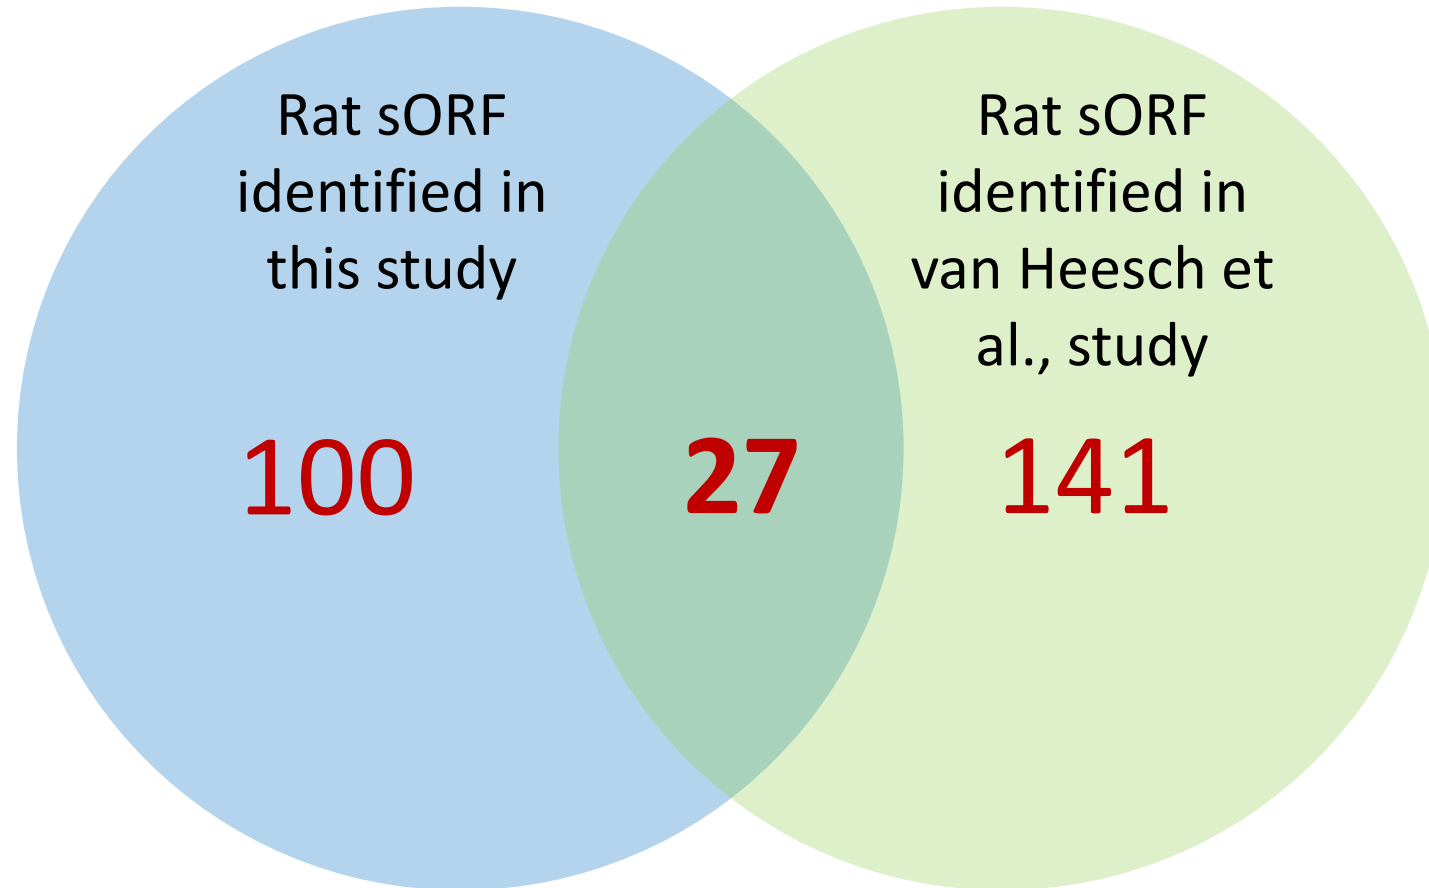

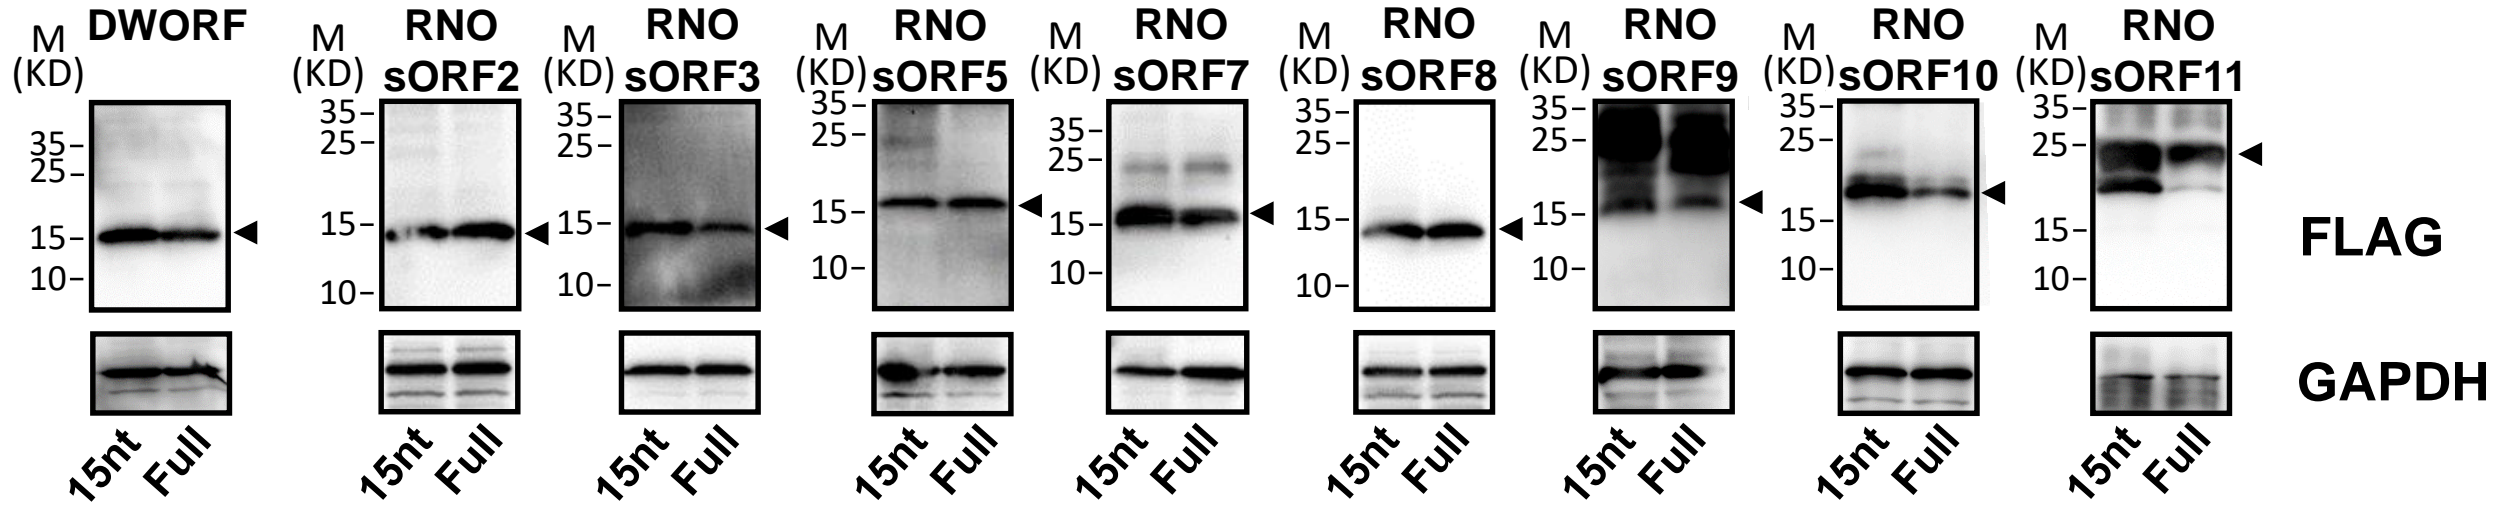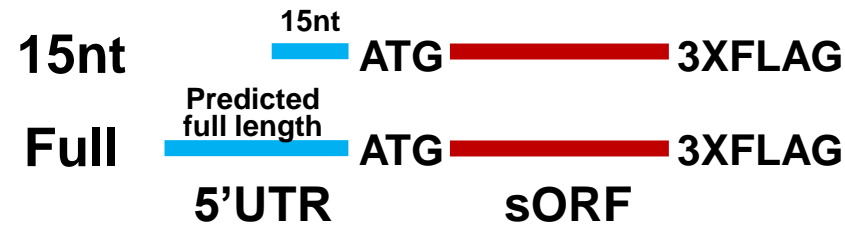

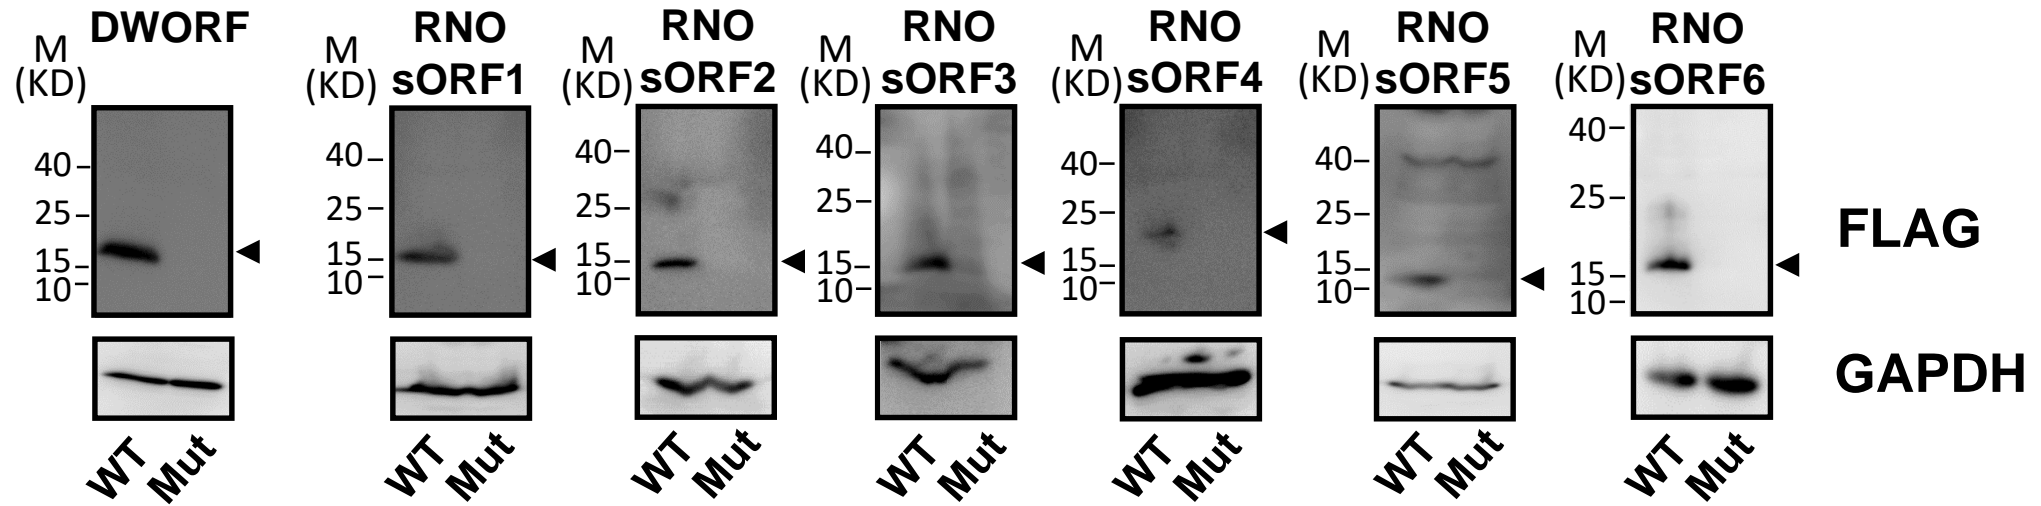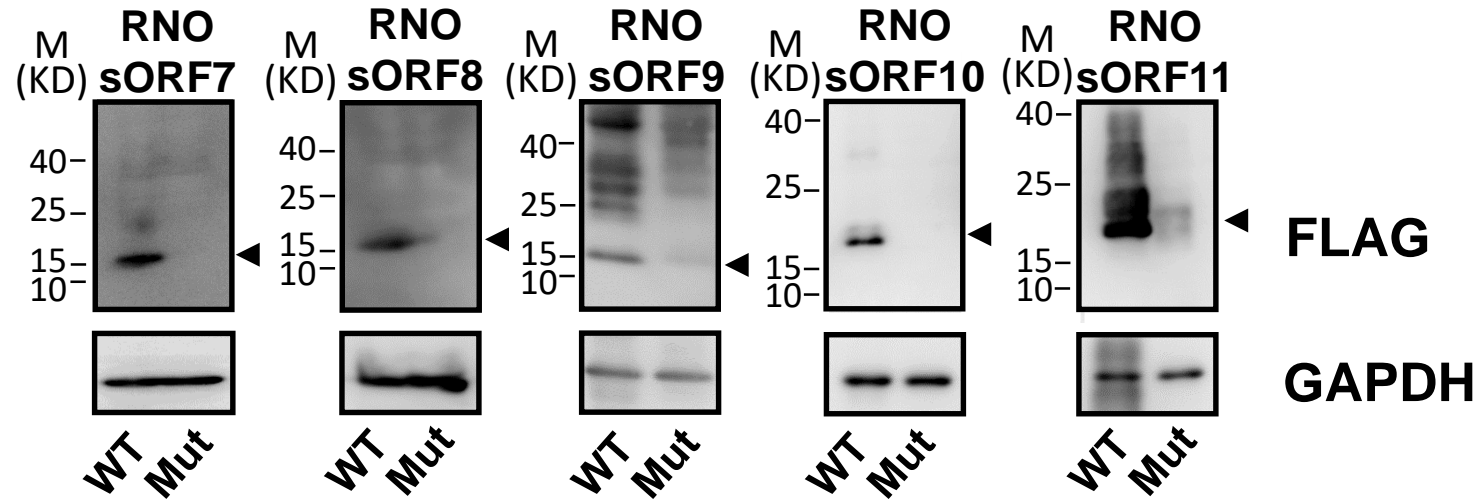

**WT**    — **ATG**    — **3XFLAG**  
**Mutant**    — **ATG****N** — **3XFLAG**  
**5'UTR**                      **sORF**

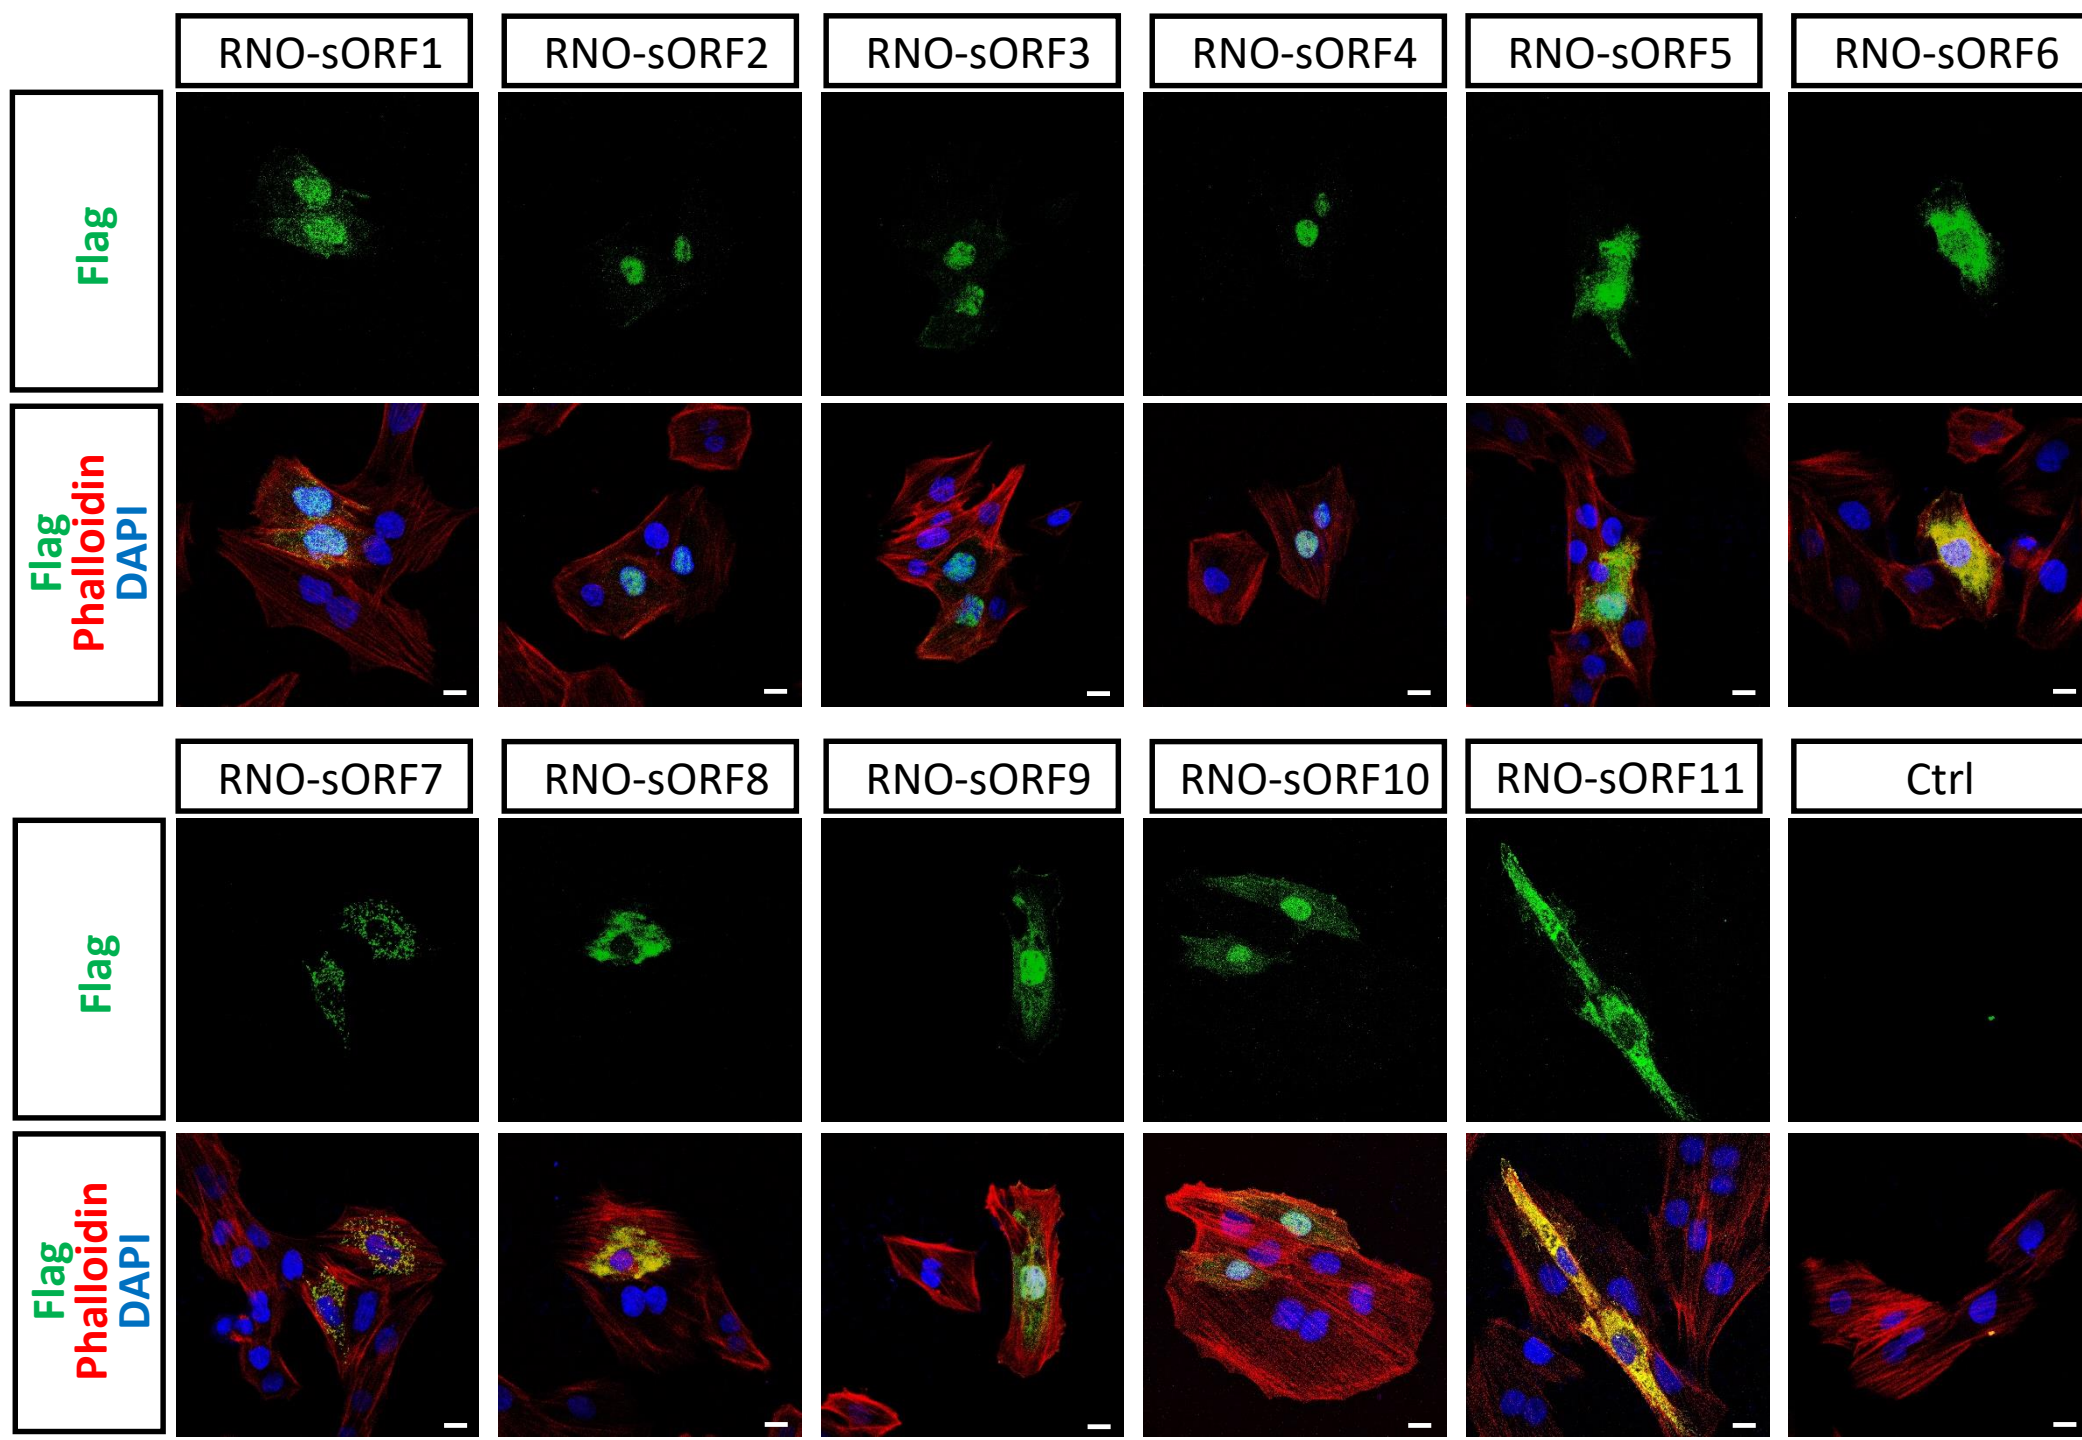



**gRNA1**

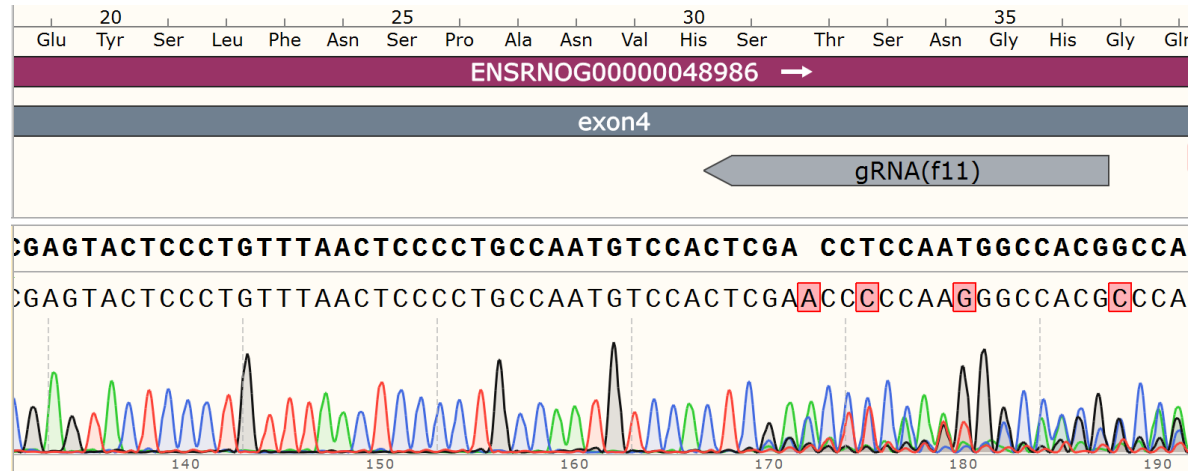

**gRNA2**

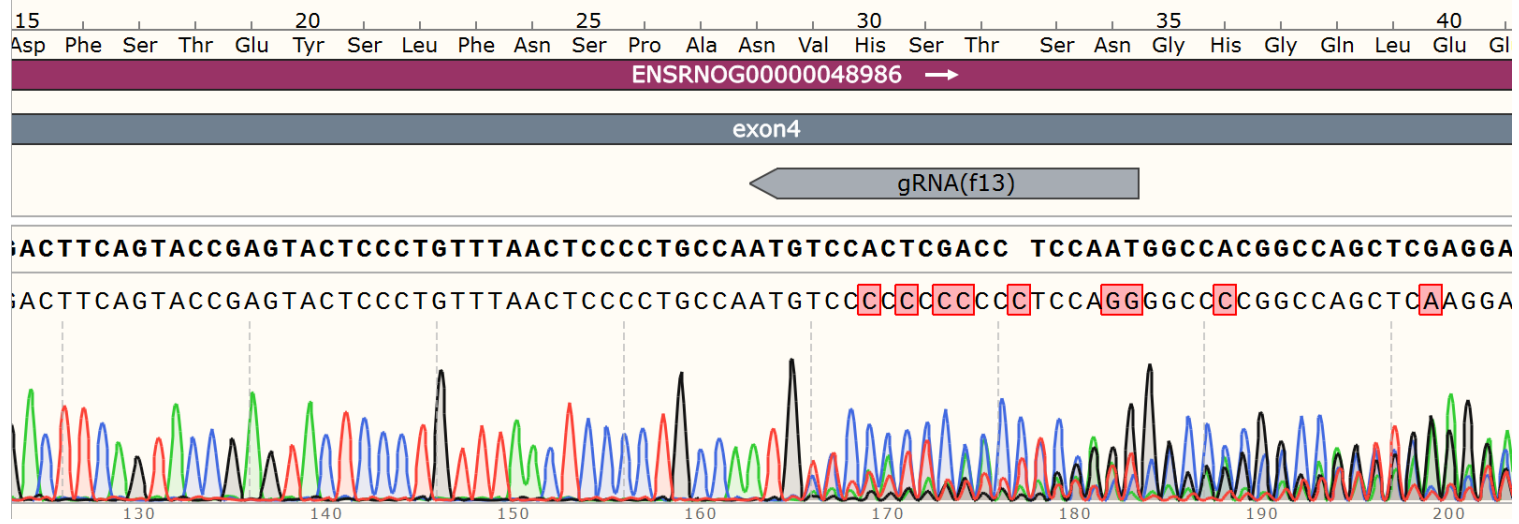

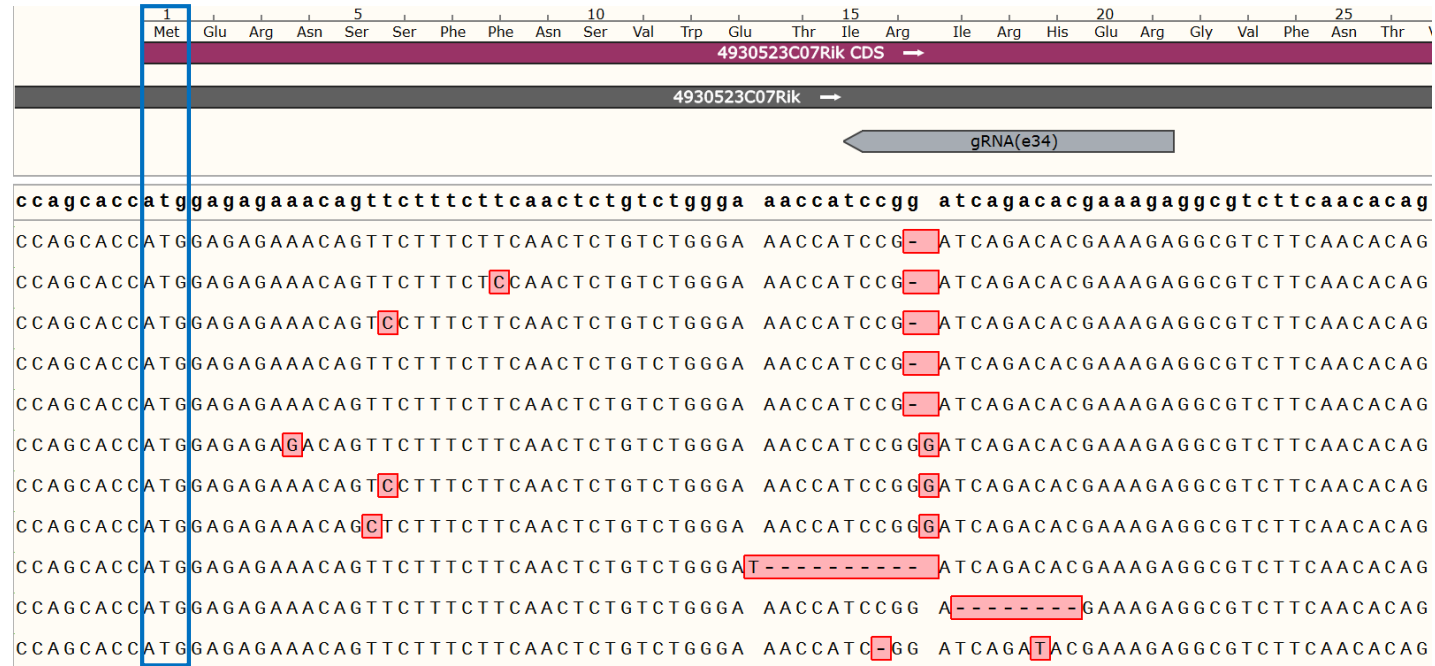

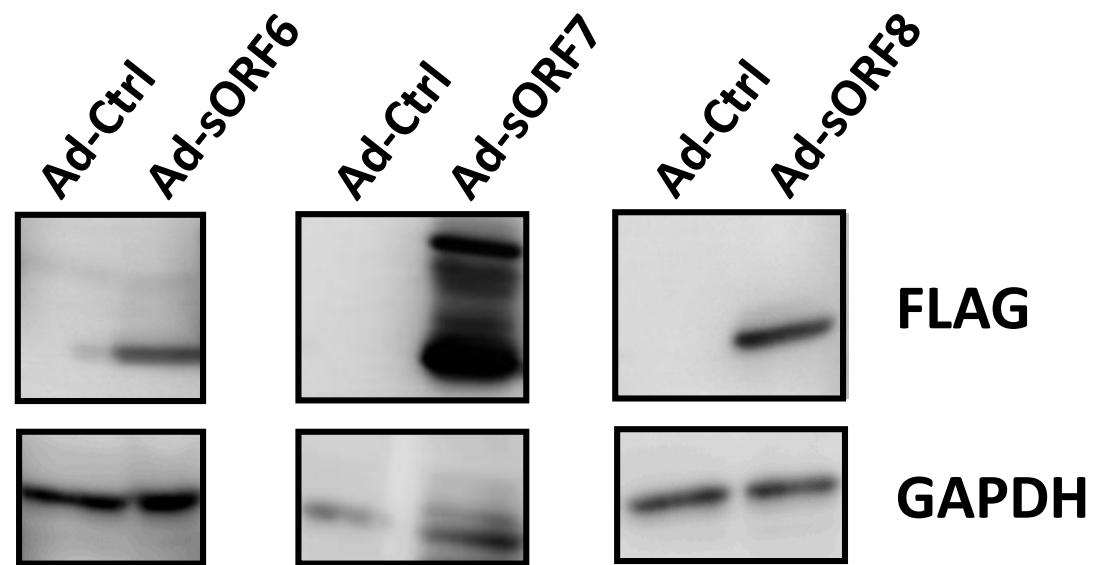

## RNO-sORF6-mutant

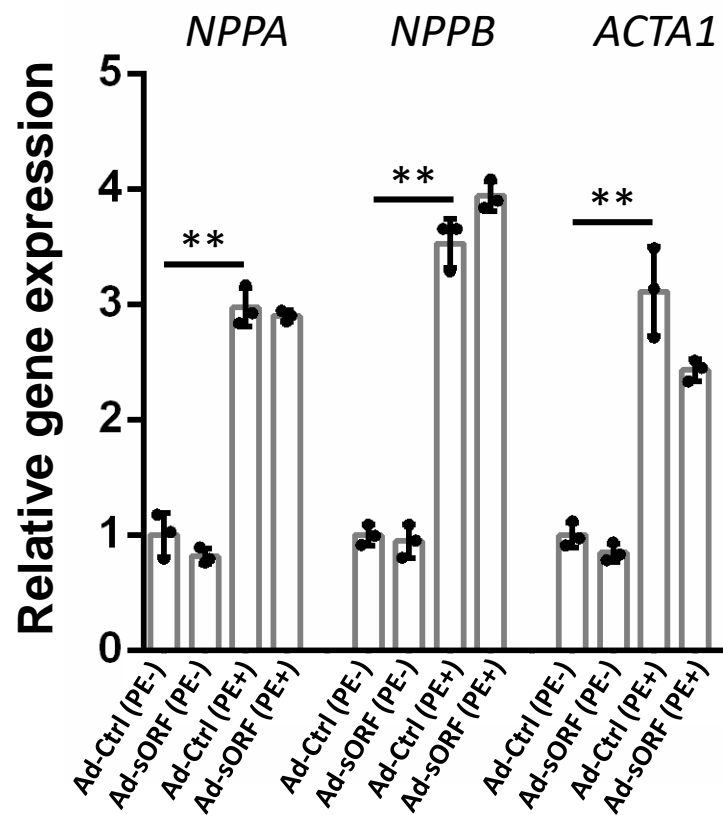

## RNO-sORF7-mutant

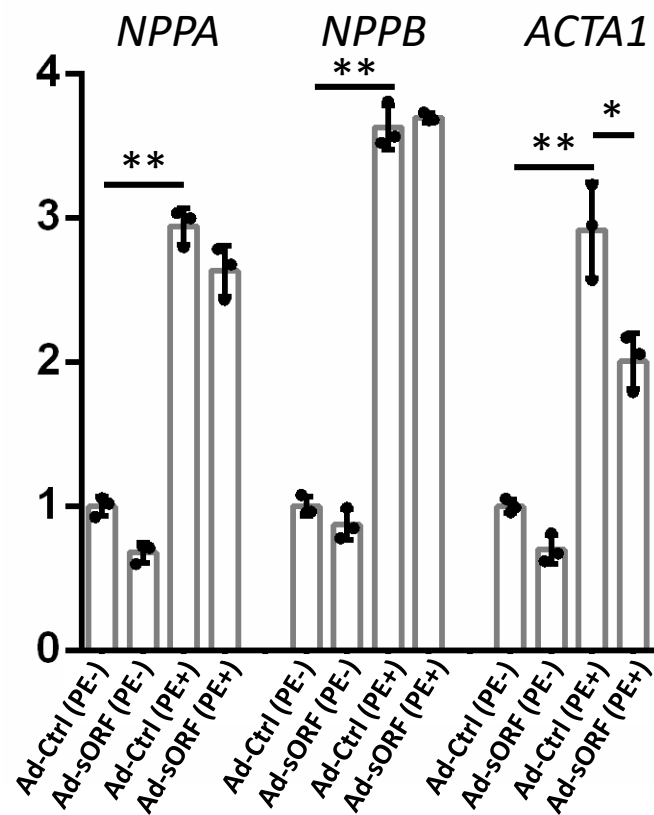

## RNO-sORF8-mutant

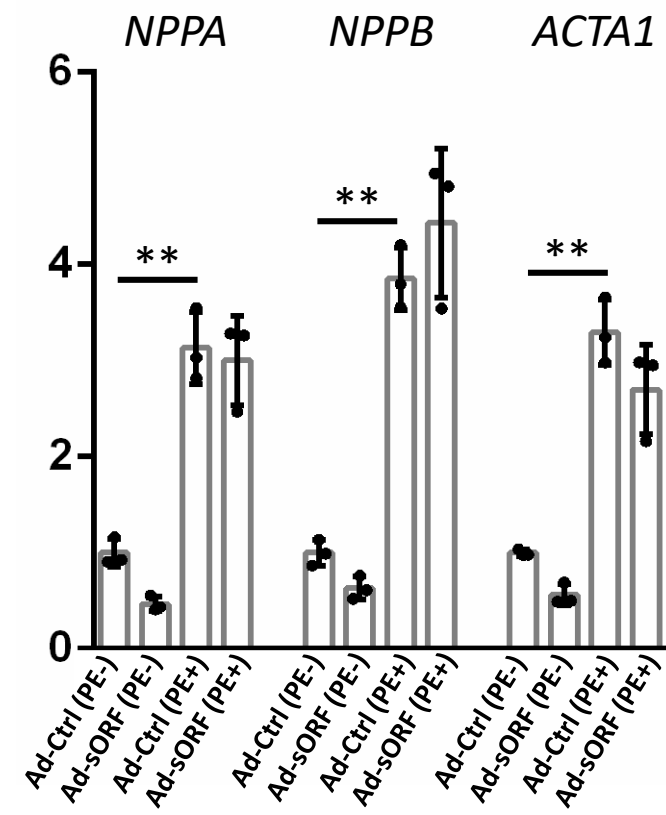

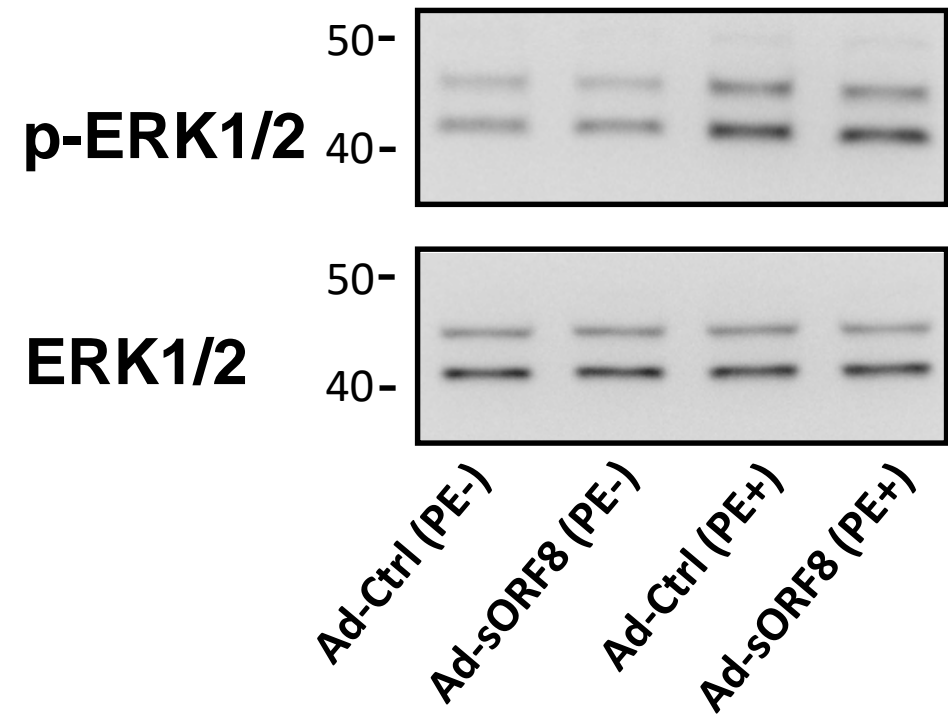

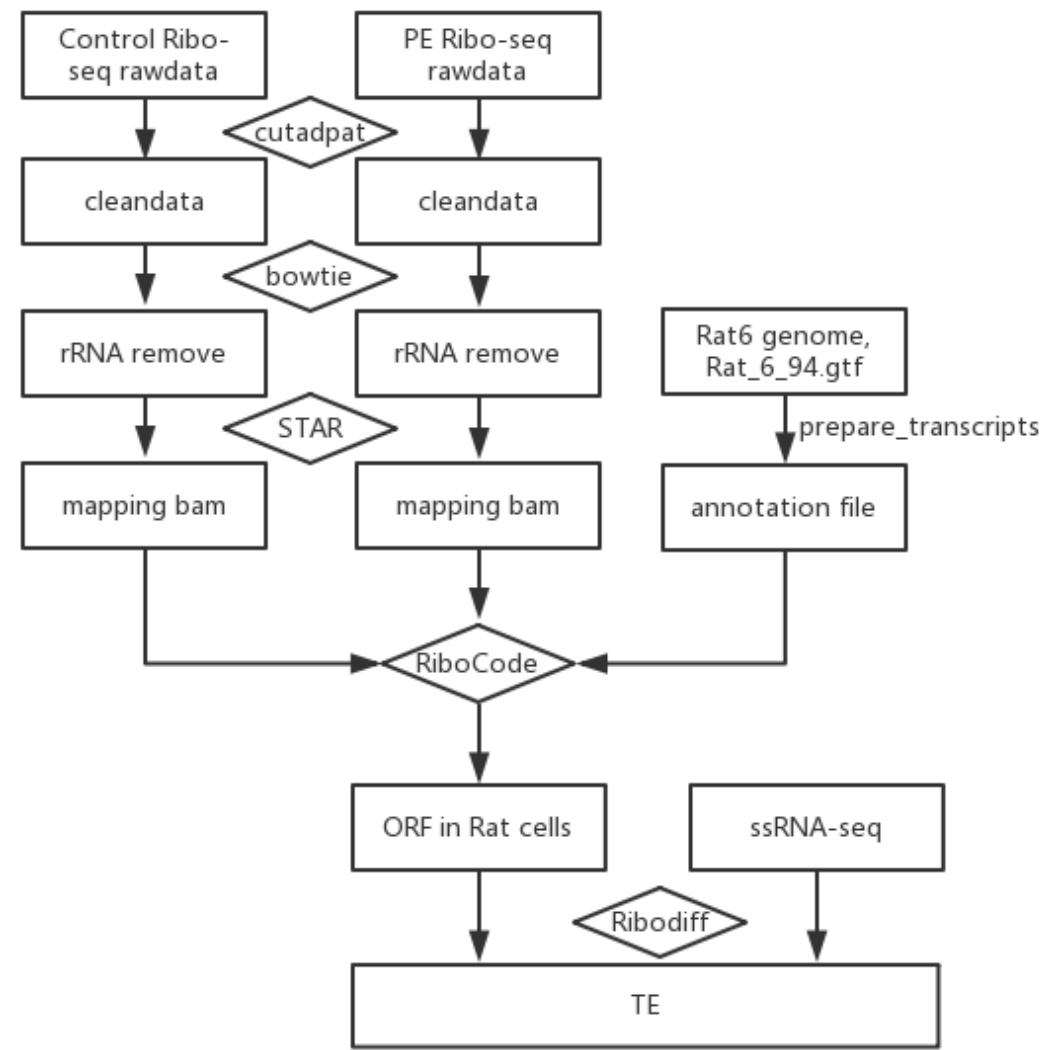

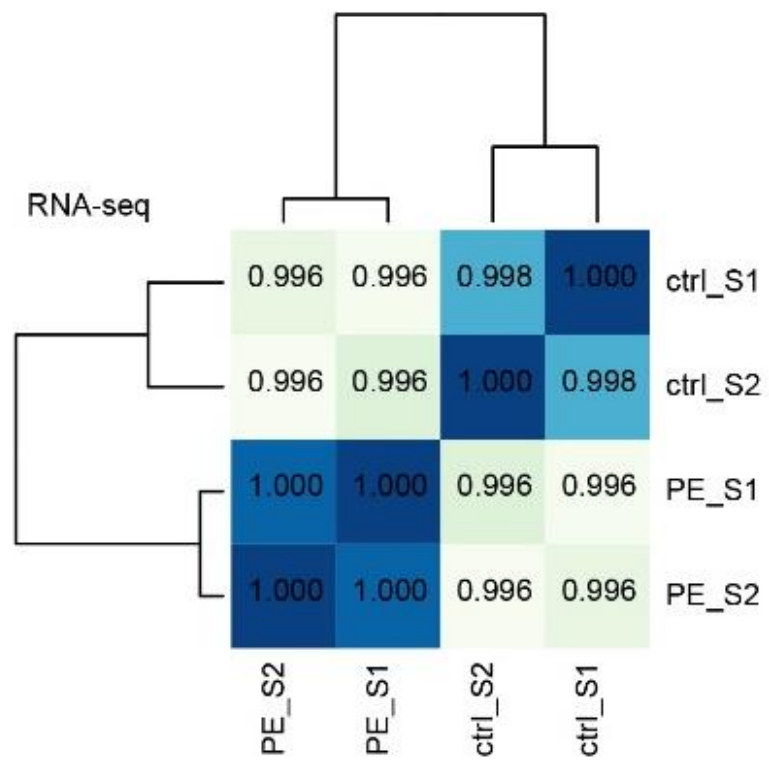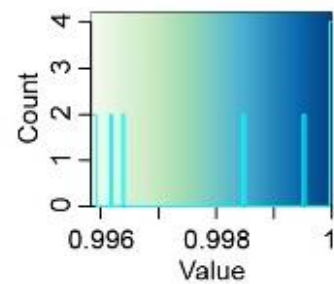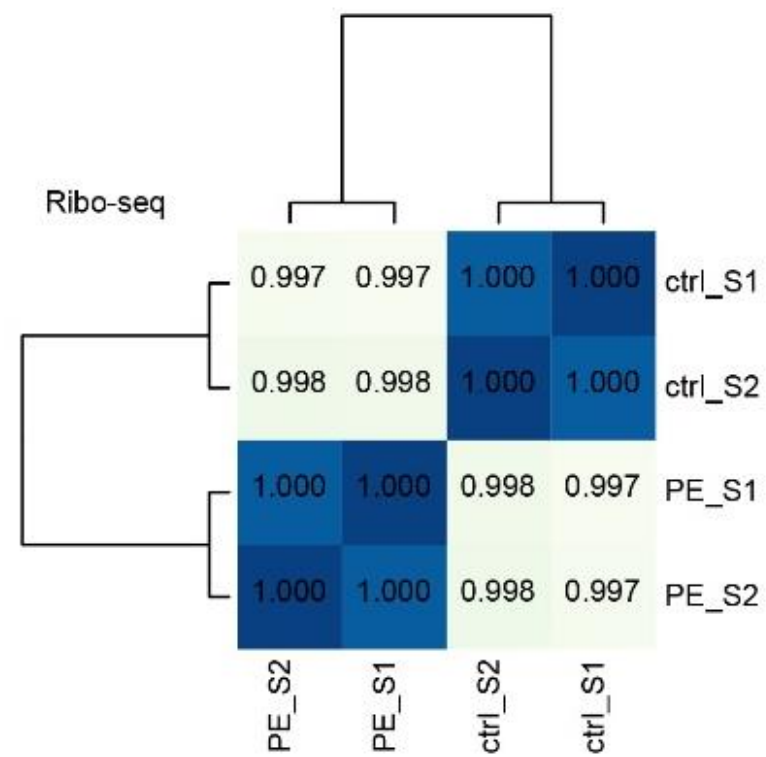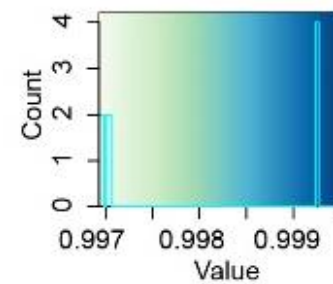

## Supplemental Figure legend

**Supplemental Figure 1. Examination of PE-induced cardiomyocyte hypertrophy.** (A) Immunostaining for  $\alpha$ -actinin in primary neonatal rat ventricular cardiomyocytes under phenylephrine treatment or control conditions. Scale bar=100 $\mu$ m; (B) Quantitative analysis of cardiomyocyte cell size. At least 200 cardiomyocytes from 8 staining images were measured for each group (C) Expression of hypertrophic markers, ACTA1 and NPPA, in PE-treated and control cardiomyocytes. N=3 for each group. \*\*P<0.01.

**Supplemental Figure 2. Alignments of gene translational efficiency to its expression level in translation and transcription.** Genes in PI3K/AKT signaling pathway (A) and MAPK signaling pathway (B) with FDR<0.05 in ribo-seq were aligned. Genes are indicated by bars in each column. Genes are sorted based on their TE. Bars in red and blue indicate TE for these genes significantly increased and decreased, respectively.

**Supplemental Figure 3. Plots of ratio of translational efficiency change of uORF and ORF for subsets of uORF-ORF pairs.** uORF-ORF pairs (red dots) in PI3K/AKT signaling pathway (A) and MAPK signaling pathway (B) were analyzed. The smaller gray dots are ORF pairs shown in Fig 4D (all uORF-ORF pairs).

**Supplemental Figure 4. The overlap of sORFs identified in this study and previous report** (*Cell* 178, 242-260)

**Supplemental Figure 5. Analyses of the translation of sORFs with different 5'UTR.** sORFs with 15nt and predicted full-length 5'UTR were cloned into the 3XFLAG-tagged expressing vector (inlet). Ectopic expression of flag-tagged micropeptides was detected by western blotting with anti-FLAG antibodies. The detected GAPDH expression serves as loading control.

**Supplemental Figure 6. A frameshift mutation abolished the expression of micropeptide.** Wild-type (WT) and mutant (Mut, one nucleotide insertion after ATG start codon) sORFs were cloned into the 3XFLAG-tagged expressing vector (inlet). Ectopic expression of flag-tagged micropeptides was detected by western blotting with anti-FLAG antibodies. The detected GAPDH expression serves as loading control.

**Supplemental Figure 7. Detection of cellular localization of micropeptides.** The expression of FLAG-tagged micropeptides mediated by adenovirus is determined by immunostaining in H9C2 cardiomyocytes. Cardiomyocytes were co-stained with Phalloidin. Nuclei are indicated by DAPI. Scale bar=10  $\mu$ m.

**Supplemental Figure 8. Sequence confirmation of CRISPR/Cas9-mediated gene editing in sORF9 in H9C2 cells.** PCR amplicons of sORF9 DNA locus from mixed H9C2 cell population after CRISPR/Cas9-mediated gene editing were sequenced. DNA mutations are boxed. Experiments from two independent gRNAs are shown.

**Supplemental Figure 9. Sequence confirmation of CRISPR/Cas9-mediated gene editing in sORF11 in NIH-3T3 cells.** sORF11 DNA from NIH-3T3 cells after CRISPR/Cas9-mediated gene



editing was cloned. 11 out of 12 clones subjected to sequence showed a frameshift mutation in sORF11. ATG start codon is highlighted. DNA mutations are boxed. gRNAs are indicated.

**Supplemental Figure 10. Detection of the overexpression of micropeptides mediated by adenovirus in NRVC.** The 3XFLAG-tagged fusion micropeptides and GAPDH (control) were detected with specific antibodies.

**Supplemental Figure 11. The regulatory effect of micropeptides on cardiomyocyte hypertrophy is abolished when the translation of sORFs is disrupted by ATG start codon deletion.** Expression of hypertrophic markers, NPPA, NPPB and ACTA1 in PE-treated or control cardiomyocytes transduced with control or sORF mutant adenovirus was determined by qRT-PCR. N=3 for each group. \*\*P<0.01, \*P<0.05.

**Supplemental Figure 12. Detection of the phosphorylation of ERK in sORF8-overexpressing cardiomyocyte during hypertrophy by western blotting.** The phosphorylation ratio of ERK did not alter when sORF8 was overexpressed during PE-induced cardiomyocyte hypertrophy compared to PE-treated control cardiomyocyte.

**Supplemental Figure 13. The workflow of Ribo-seq analysis**

**Supplemental Figure 14. Correlation analyses of replicates of RNA-seq and Ribo-seq.** Heatmaps of Pearson correlation coefficient of replicates of RNA-seq and Ribo-seq are shown. Pearson correlation coefficient values are indicated and coded by colors illustrated below.

### Supplemental Table 1. QC data of Ribo-seq and RNA-seq

| Ribo-seq                  | Control_S1        | Control_S2        | PE_S1             | PE_S2             |
|---------------------------|-------------------|-------------------|-------------------|-------------------|
| Raw Reads Number          | 51990940          | 63527981          | 58779595          | 56823796          |
| Clean Reads Number        | 42310466 (81.4%)  | 49317040 (77.6%)  | 49051163 (83.4%)  | 46377074 (81.6%)  |
| rRNA Mapping Reads Number | 10764584 (20.7%)  | 12553104 (19.8%)  | 19127536 (32.5%)  | 16790553 (29.5%)  |
| Uniquely mapped reads     | 20645038 (39.7%)  | 24519478 (38.6%)  | 24519478 (41.7%)  | 19192042 (33.8%)  |
| RNA-seq                   | Control_S1        | Control_S2        | PE_S1             | PE_S2             |
| Raw Reads Number          | 216147226         | 201261528         | 233226640         | 209601716         |
| Clean Reads Number        | 208556212 (96.5%) | 194411426 (96.6%) | 224962006 (96.5%) | 201193324 (96.0%) |
| rRNA Mapping Reads Number | 314042 (0.15%)    | 689082 (0.34%)    | 379646 (0.16%)    | 452578 (0.22%)    |
| Uniquely mapped reads     | 92415284 (42.8%)  | 85951491 (42.7%)  | 100585155 (43.1%) | 89697979 (42.8%)  |

**Supplemental Table 2. Raw counts of reads mapped to all ORFs and their transcripts.**

**Supplemental Table 3. Information of differentiated expressed genes in RNA-seq.**

**Supplemental Table 4. Information of differentiated expressed genes in ribo-seq.**

**Supplemental Table 5. Information of genes with significant change in translational efficiency.**

**Supplemental Table 6. Information of uORFs identified from the bioinformatic screening.**

**Supplemental Table 7. Information of sORFs identified from the bioinformatic screening.**



**Supplemental Table 8. Expression (RPKM) of RNA transcripts harboring sORFs from RNA-seq**

| geneID             | ctrl_S1  | ctrl_S2  | PE_S1    | PE_S2    | ctrl_Mean | PE_Mean  |
|--------------------|----------|----------|----------|----------|-----------|----------|
| ENSRNOG00000057352 | 5.611408 | 5.722743 | 4.954936 | 4.592459 | 5.667076  | 4.773697 |
| ENSRNOG00000059100 | 4.141101 | 5.601615 | 5.647042 | 3.9271   | 4.871358  | 4.787071 |
| ENSRNOG00000058926 | 0.41044  | 0.8171   | 0.962179 | 1.044773 | 0.61377   | 1.003476 |
| ENSRNOG00000057834 | 1.579457 | 1.126796 | 0.695557 | 1.069656 | 1.353126  | 0.882607 |
| ENSRNOG00000057097 | 0.712452 | 0.591175 | 0.794698 | 0.651712 | 0.651813  | 0.723205 |
| ENSRNOG00000054516 | 0.003717 | 0        | 0.001694 | 0.01405  | 0.001859  | 0.007872 |
| ENSRNOG00000051251 | 0.375349 | 0.831518 | 0.774431 | 0.810685 | 0.603433  | 0.792558 |
| ENSRNOG00000048986 | 0        | 0.086951 | 1.74204  | 1.650831 | 0.043475  | 1.696436 |
| ENSRNOG00000049537 | 3.925878 | 3.779405 | 4.724359 | 4.41977  | 3.852642  | 4.572065 |

## Supplemental Table 9. Information of primers used in this study.

| GENE               | Forward primer (5'→3')      | Reverse primer (5'→3')     |
|--------------------|-----------------------------|----------------------------|
| GAPDH              | ACAAC TTTGGCATCGTGGA A      | GATGCAGGGATGATGTTCTG       |
| NPPA               | CAACACAGATCTGATGGATTCA      | CCTCATCTTCTACCGGCATC       |
| NPPB               | GTCAGTCGCTTGGGCTGT          | CCAGAGCTGGGGAAAGAAG        |
| ACTA1              | AGCTATGAGCTGCCTGACG         | GATCCCCGCAGACTCCATA        |
| ACTB               | CCCGCGAGTACAACCTTCT         | CGTCATCCATGGCGAACT         |
| RN18S              | GCCGCTAGAGGTGAAATTCTT       | CGTCTTCGAACCTCCGACT        |
| ENSRNOG00000057352 | AAACTGAGGCCCGAGGAT          | CACTTGCAGAACAGTGAAGCA      |
| ENSRNOG00000059100 | CCAGGAAATGGCTATCAATACG      | CCTTGGGTCAGTCACTTCATC      |
| ENSRNOG00000058926 | TGTGGGCCAAAGAACAGAG         | CTTCTTCAGCAATGGGTGGT       |
| ENSRNOG00000057834 | AGACGTCTGTGCGCTTCT          | GCCATCGTGTTAATGTATTCTG     |
| ENSRNOG00000057097 | TTGGACAGAGATGCCGAGA         | GTTCCCGAGCCTCACACA         |
| ENSRNOG00000054516 | CTTGCCAACAGGGAAGTCAG        | TGAAAGTGGAGGTGCTGTGA       |
| ENSRNOG00000051251 | CTGGCCTGCAAAGGAATCT         | GACCGTACCTCAGGCATCTC       |
| ENSRNOG00000048986 | CCAATGTCCACTCGACCTCC        | AGGCATACACCACCCTACT        |
| ENSRNOG00000049537 | GAACAGATCCAGCGGTCTCT        | AAGCCACTGGGAGCACCT         |
| CDKN1A             | GACATCTCAGGGCCGAAA          | GGCGCTTGGAGTGATAGAAA       |
| CDK2               | TCCTCTTCCCCTCATCAAGA        | CGGTGAGAATGGCAGAATG        |
| CCNE1              | CTGAGAGATGAGCACTTTCTGC      | TGGAGCTTATAGACTTCACACACC   |
| PCNA               | AAATGTGCTGGAATGAAGACATC     | CATAGTCTGAAACTTTCTTTGATTTG |
| JUNB               | GGGACTGGGAGCTCATACC         | AAAGGGTGGTGCATGTGG         |
| BCL3               | GCCGGAGGCTCTTTACTACC        | GGCCATAGTCGGGGTAGAGTA      |
| TNFAIP3            | GCTCAACTGGTGTGCTGAAG        | ATGAGGCAGTTTCCATCACC       |
| CEBPB              | GCTGAGCGACGAGTACAAGA        | CAGCTCCAGCACCTTGTG         |
| CACNA1S            | TTCACTGTGGAGATCGTCCTT       | TTGAAGTAGTTGCGGCAGAA       |
| FGFR3              | CCAGAGCAGCGAGTTGGT          | TGCTCCTGCTGGCTAGGT         |
| TGFB3              | AGTGGCTGTTGCGGAGAG          | GCTGAAAGGTATGACATGGACA     |
| ELK4               | CACCAGCACTCTTCTCACAGA       | GTGCTCCAAAAGTGGATGCT       |
| MDM2               | CAGAAACTTAGTGGTTGTAAGTCAACA | TTCAGGTCACCTCCACCTTC       |
| PMAIP1             | GCGAAAGAGCACGATGAGA         | GATCACACTCGTCCTTCAGGT      |
| BAX                | CGAGCTGATCAGAACCATCA        | GGGGTCCCCAAGTAGGAA         |
| PLN                | GACGATCACAGAAGCCAAGG        | GACAGCAGGCAGCCAAAC         |
| PDGFRA             | GCTACACGTTTGAGCTGTCAAC      | ATGGTGGTCATCCACAAGC        |
| CALM3              | CTGCAGGACATGATCAATGAG       | TGGTCAGGAACTCTGGGAAG       |
| IGF2               | CGCTTCAGTTTGTCTGTTG         | GCAGCACTTCCACGATG          |
| DUSP3              | AAGGGCTGCAGACTTCATTG        | ACGGCAATGGACAAGCAC         |
| MAP2K1             | CAAGATGCCCAAGAAGAAGC        | AGGCCTCCAGTTGGTCT          |
| IL6                | CCTGGAGTTTGTGAAGAACAAC      | GGAAGTTGGGGTAGGAAGGA       |
| HMOX1              | GTCAGGTGTCCAGGGAAGG         | CTCTTCCAGGGCCGTATAGA       |
| CYC1               | GGCATCTTCCATTACGGACA        | CCACAGCTAGCCCTGCAC         |
| UQCRH              | GCACGGGATCACTGTGTG          | AGCAAGCTGTTCCGATTCC        |
| SDHA               | CCCTGAGCATTGCAGAATC         | CATTTGCCTTAATCGGAGGA       |
| MDH2               | CCTTGACATCGTCAGAGCAA        | ACTCGAGCTGGGTCCAAAC        |
| IDH2               | TGGCAGTTCATCAAGGAGAA        | TTGGTCTGGTCACGGTTTG        |
| ACO2               | ACTGGAGCCTCGCCATCT          | GCCCTGCTTCTTTAGATTGGT      |
| NUP153             | CATTCTGAAAACGCCTGGTT        | TGCTGGTCTTGATAAACTATTGAGC  |
| XPOT               | CGAATGCCGATTCACTTTTA        | AGGCATCTGGGGAAATCTTTA      |
| RPP25              | GACCCAGGAGGAACTTGC          | TTGGAAGCAATACTCCAGCA       |
| TGFB2              | GACATGCCGTCCACTTC           | CACTGAGCCAGAGGATGTTG       |
| RYR2               | GGAAGTGAAGCAGCCCAAG         | TCATCCATGTGTCCATGTAGC      |
